# Supplementary material for: Coarse particulate matter air quality in East Asia: implications for fine particulate nitrate
Source: Copernicus journal article supplement (doi:10.5194/acp-23-4271-2023), 2023-04-12
Supplement: Supplementary file 1 [file acp-23-4271-2023-supplement.pdf]

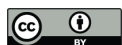

*Supplement of*

## **Coarse particulate matter air quality in East Asia: implications for fine particulate nitrate**

**Shixian Zhai et al.**

*Correspondence to:* Shixian Zhai (zhaisx@g.harvard.edu)

The copyright of individual parts of the supplement might differ from the article licence.

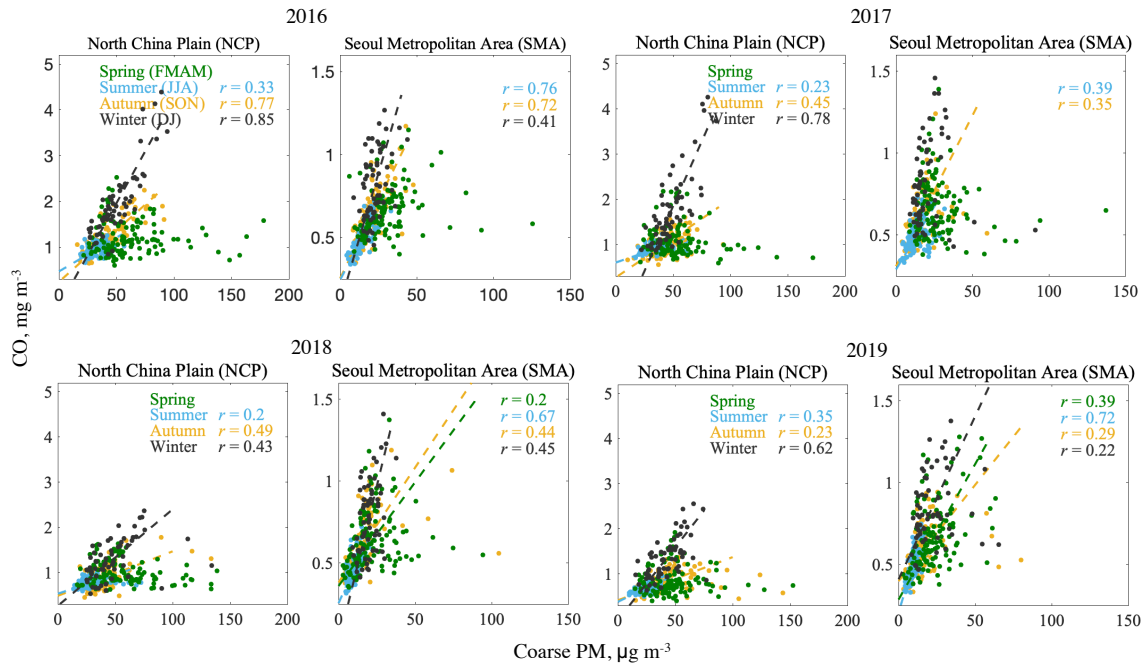

8

9 Figure S1. Daily correlations of coarse PM and CO over the North China Plain (NCP) and Seoul Metropolitan Area  
 10 (SMA). Same as Fig. 3 in the main text but for the years 2016, 2017, 2018, and 2019.

11

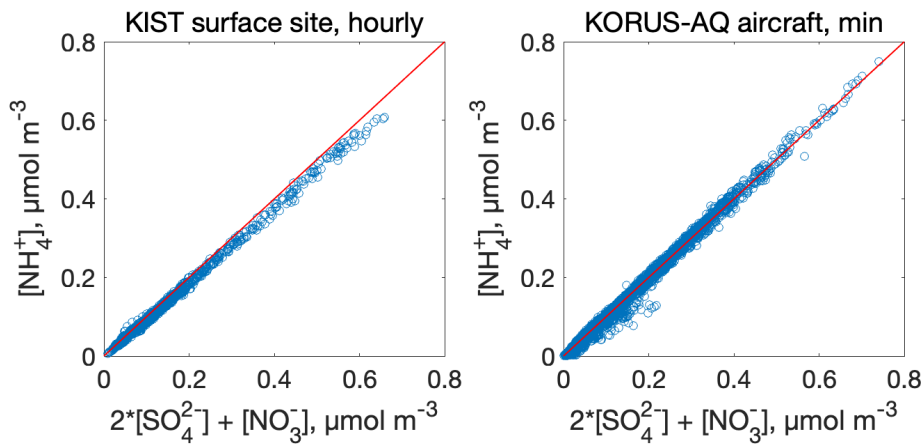

12  
 13 Figure S2. Ionic charge balance of AMS PM<sub>1</sub> during KORUS-AQ over SMA. Here the ionic charge balance is  
 14 represented by scatterplots of  $2 \cdot [\text{SO}_4^{2-}] + [\text{NO}_3^-]$  and  $[\text{NH}_4^+]$  molar concentrations at the surface KIST site (left) and on  
 15 the DC-8 aircraft (right).  $2 \cdot [\text{SO}_4^{2-}] + [\text{NO}_3^-]$  and  $[\text{NH}_4^+]$  are in charge balance, suggesting that AMS measured nitrate is  
 16 mainly inorganic nitrate that is associated with ammonium.

17

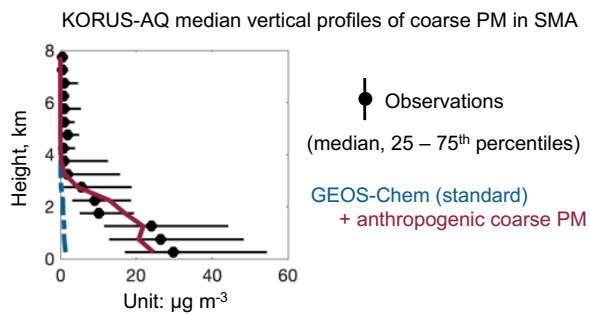

18

19 Figure S3. Median vertical profiles of coarse PM over SMA during KORUS-AQ. Data filtering criteria is the same as  
 20 Fig. 4 in the main text. Aircraft observations of coarse PM are derived from the size distribution measurements by in-  
 21 situ Aerosol Particles from the DMT CPSPD Probe.

22

23

Diurnal variations of PM<sub>1</sub> nitrate and NH<sub>3</sub> at surface sites in SMA and diurnal scaling factors of NH<sub>3</sub> emission

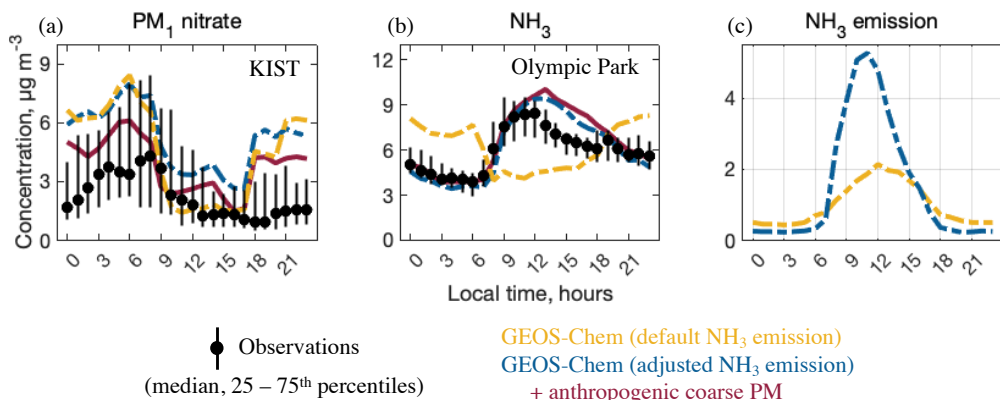

24  
25

Figure S4. Effects of anthropogenic coarse PM and diurnal variations of NH<sub>3</sub> emission on PM<sub>1</sub> nitrate and NH<sub>3</sub> over Seoul Metropolitan Area (SMA) during KORUS-AQ. Same as Fig. 4a in the main text but with the diurnal profiles of NH<sub>3</sub> at the Olympic Park site in SMA, diurnal scaling factors of NH<sub>3</sub> emission, and GEOS-Chem model results with default and adjusted NH<sub>3</sub> emissions added. NH<sub>3</sub> was measured by ion chromatography at the Olympic Park site in SMA, ~7 km to the southeast of KIST. The default diurnal scaling factors of NH<sub>3</sub> emission is provided by the Multi-resolution Emission Inventory for China (MEIC) agriculture emission sector.

31

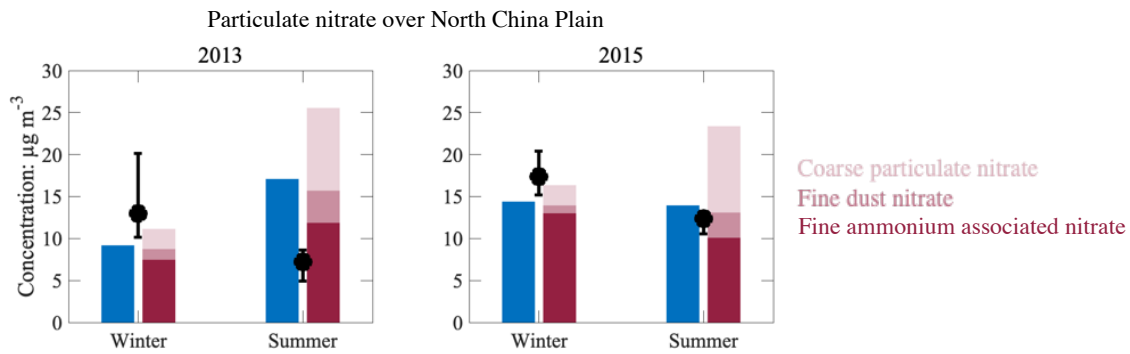

Observed PM<sub>2.5</sub> nitrate (median, 25-75<sup>th</sup> percentiles)  
 GEOS-Chem (without dust uptake of HNO<sub>3</sub> from Zhai et al. (2021))  
 + dust (natural + anthropogenic) uptake of HNO<sub>3</sub>

32

33 Figure S5. Effects of dust uptake of HNO<sub>3</sub> on winter and summer mean particulate nitrate over the North China Plain.

34 Observed PM<sub>2.5</sub> nitrate at sites in NCP and the GEOS-Chem model results without considering dust uptake of HNO<sub>3</sub>

35 are from our previous study (Zhai et al., 2021). GEOS-Chem model results are sampled at NCP observation sites.

36

37

38 Table S1 Concentrations of multi-year winter and summer mean<sup>a</sup> fine particulate nitrate observed in Beijing and Seoul,  
 39 Unit:  $\mu\text{g m}^{-3}$ . Data is visualized in Fig. 5 in the main text.

|      | Winter           |                       |                  |                   |                   | Summer |          |      |      |      |
|------|------------------|-----------------------|------------------|-------------------|-------------------|--------|----------|------|------|------|
|      | IAP <sup>b</sup> | Tsinghua <sup>c</sup> | PKU <sup>d</sup> | NIER <sup>e</sup> | KIST <sup>f</sup> | IAP    | Tsinghua | PKU  | NIER | KIST |
| 2015 | 14.6             |                       | 14.6             | 9.2               |                   | 5.0    | 8.4      | 12.3 | 0.4  |      |
| 2016 |                  |                       |                  | 7.9               | 6.6               |        |          |      | 1.3  | 1.4  |
| 2017 |                  | 16.5                  |                  | 9.4               | 8.9               |        | 7.7      |      | 0.8  |      |
| 2018 | 14.7             | 11.5                  |                  | 6.7               | 5.2               | 8.6    | 9.0      |      | 0.7  | 0.5  |
| 2019 | 11.4             | 12.8                  |                  | 10.3              | 10.5              | 6.1    | 7.6      |      | 0.7  |      |
| 2020 | 13.8             | 15.8                  |                  |                   |                   | 7.2    | 8.5      |      |      | 0.3  |
| 2021 |                  | 19.2                  |                  |                   |                   | 3.0    | 6.8      |      |      |      |

40 <sup>a</sup> Winter mean are December-January-February averages and summer mean are June-July-August averages unless  
 41 otherwise noted.

42 <sup>b</sup> Winter mean fine particulate nitrate at the Institute of Atmospheric Physics (IAP) site are January-February-March  
 43 averages (Lei et al., 2021). Winter data for year 2015 and year 2018 are Q-ACSM NR-PM<sub>1</sub>. Winter data for year 2019  
 44 and 2020 are ToF-ACSM NR-PM<sub>2.5</sub>. Summer data for year 2015 (1 June - 3 July and 15 August - 31 August) are AMS  
 45 NR-PM<sub>1</sub>. Summer data for years 2018, 2019, 2020, and 2021 are ACSM NR-PM<sub>2.5</sub>.

46 <sup>c</sup> PM<sub>2.5</sub> nitrate at Tsinghua campus from 2017 to 2021 are measured by Monitor for AeRosols and Gases (MARGA,  
 47 Metrohm Ltd., Switzerland) (Xu et al., 2019). Winter mean are January-February-March averages. PM<sub>1</sub> nitrate in  
 48 summer 2015 is from Li et al. (2018).

49 <sup>d</sup> Data is from ref Liu et al. (2019).

50 <sup>e</sup> Data is measured by an ambient ion monitor (AIM, URG-9000D/USA)(Jo et al., 2020; Jeong et al., 2022).

51 <sup>f</sup> PM<sub>1</sub> nitrate at the Korea Institute of Science and Technology (KIST) site is HR-ToF-AMS NR-PM<sub>1</sub> (Kim et al.,  
 52 2017). Winter mean concentration are averaged from 5 December 2015 to 21 January 2016 for year 2016 (Kim et al.,  
 53 2017), from 1 January 2017 to 10 February 2017 for year 2017, from 17 January 2018 to 22 February 2018 for year  
 54 2018, and from 22 February 2019 to 2 April 2019 for year 2019 (Kim et al., 2020). Summer mean concentration are  
 55 averaged from 27 July to 31 August for year 2016, from 6 August to 31 August for year 2018, from 13 August to 31  
 56 August for year 2020.

57

58 **References**

- 59 Jeong, J. I., Seo, J., and Park, R. J.: Compromised Improvement of Poor Visibility Due to PM Chemical  
60 Composition Changes in South Korea, *Remote Sens.*, 14, 5310, <https://doi.org/10.3390/rs14215310>,  
61 2022.
- 62 Jo, Y.-J., Lee, H.-J., Jo, H.-Y., Woo, J.-H., Kim, Y., Lee, T., Heo, G., Park, S.-M., Jung, D., Park, J., and  
63 Kim, C.-H.: Changes in inorganic aerosol compositions over the Yellow Sea area from impact of  
64 Chinese emissions mitigation, *Atmos. Res.*, 240, 104948,  
65 <https://doi.org/10.1016/j.atmosres.2020.104948>, 2020.
- 66 Kim, H., Zhang, Q., and Sun, Y.: Measurement report: Characterization of severe spring haze episodes and  
67 influences of long-range transport in the Seoul metropolitan area in March 2019, *Atmos. Chem. Phys.*,  
68 20, 11527-11550, <https://doi.org/10.5194/acp-20-11527-2020>, 2020.
- 69 Kim, H., Zhang, Q., Bae, G. N., Kim, J. Y., and Lee, S. B.: Sources and atmospheric processing of winter  
70 aerosols in Seoul, Korea: insights from real-time measurements using a high-resolution aerosol mass  
71 spectrometer, *Atmos. Chem. Phys.*, 17, 2009-2033, <https://doi.org/10.5194/acp-17-2009-2017>, 2017.
- 72 Lei, L., Zhou, W., Chen, C., He, Y., Li, Z., Sun, J., Tang, X., Fu, P., Wang, Z., and Sun, Y.: Long-term  
73 characterization of aerosol chemistry in cold season from 2013 to 2020 in Beijing, China, *Environ.*  
74 *Pollut.*, 268, 115952, <https://doi.org/10.1016/j.envpol.2020.115952>, 2021.
- 75 Li, H., Zhang, Q., Zheng, B., Chen, C., Wu, N., Guo, H., Zhang, Y., Zheng, Y., Li, X., and He, K.: Nitrate-  
76 driven urban haze pollution during summertime over the North China Plain, *Atmos. Chem. Phys.*, 18,  
77 5293-5306, <https://doi.org/10.5194/acp-18-5293-2018>, 2018.
- 78 Liu, M., Huang, X., Song, Y., Tang, J., Cao, J., Zhang, X., Zhang, Q., Wang, S., Xu, T., Kang, L., Cai, X.,  
79 Zhang, H., Yang, F., Wang, H., Yu, J. Z., Lau, A. K. H., He, L., Huang, X., Duan, L., Ding, A., Xue,  
80 L., Gao, J., Liu, B., and Zhu, T.: Ammonia emission control in China would mitigate haze pollution  
81 and nitrogen deposition, but worsen acid rain, *Proc. Natl. Acad. Sci. USA*, 116, 7760-7765,  
82 <https://doi.org/10.1073/pnas.1814880116>, 2019.
- 83 Xu, Q., Wang, S., Jiang, J., Bhattarai, N., Li, X., Chang, X., Qiu, X., Zheng, M., Hua, Y., and Hao, J.:  
84 Nitrate dominates the chemical composition of PM<sub>2.5</sub> during haze event in Beijing, China, *Sci. Total*  
85 *Environ.*, 689, 1293-1303, <https://doi.org/10.1016/j.scitotenv.2019.06.294>, 2019.
- 86 Zhai, S., Jacob, D. J., Wang, X., Liu, Z., Wen, T., Shah, V., Li, K., Moch, J. M., Bates, K. H., Song, S.,  
87 Shen, L., Zhang, Y., Luo, G., Yu, F., Sun, Y., Wang, L., Qi, M., Tao, J., Gui, K., Xu, H., Zhang, Q.,  
88 Zhao, T., Wang, Y., Lee, H. C., Choi, H., and Liao, H.: Control of particulate nitrate air pollution in  
89 China, *Nat. Geosci.*, 14, 389-395, <https://doi.org/10.1038/s41561-021-00726-z>, 2021.

90
